# Supplementary material
Source: PubMed Central journal article supplement (PMC3088902)
Supplement: NIHMS35219-supplement-01.pdf [file NIHMS35219-supplement-01.pdf]

1 **Supplementary Table A: Prevalence of disc degeneration in people who do not have low back pain**

| Reference                          | Population studied                                                                                   | Numbers of subjects (number male) | Mean age (range) | Number of discs examined per person | MRI index of degeneration                        | Grade of degeneration         | Prevalence % (95% CI)          |
|------------------------------------|------------------------------------------------------------------------------------------------------|-----------------------------------|------------------|-------------------------------------|--------------------------------------------------|-------------------------------|--------------------------------|
| Beattie et al, 1994 <sup>32</sup>  | Healthy women with “no significant back pain”                                                        | 20 (0)                            | 24 (20-30)       | 3                                   | Reduced signal intensity                         | Present                       | 40% (19%-64%)                  |
| Boden et al, 1990 <sup>33</sup>    | Volunteers with no history of LBP lasting > 24 hours or leading to absence from work, or of sciatica | 67 (30)                           | 42 (20-80)       | 5                                   | Reduced disc height and reduced signal intensity | Present                       | 54% (41%-66%)                  |
| Boos et al, 1995 <sup>20</sup>     | Volunteers from trauma clinic who had never consulted or been absent from work because of LBP        | 46 (34)                           | 36 (20-50)       | 5                                   | Grading system of Pearce et al <sup>†</sup>      | Present                       | 85% (71%-94%)                  |
| Carragee et al, 2000 <sup>34</sup> | Volunteers from cervical surgery and chronic pain services with no history of LBP                    | 26 (18)                           | 44 (29-56)       | 1-4 (mean = 3)                      | Unclear                                          | Moderate or severe            | 81% (61%-94%)                  |
| Chung et al, 2004 <sup>35</sup>    | Volunteers with no history of LBP or related complaints                                              | 59 (28)                           | 42 (20-75)       | 5                                   | Reduced disc height and reduced signal intensity | Present                       | 7 % (2%-17%)                   |
| Healey et al, 1996 <sup>36</sup>   | Asymptomatic athletes                                                                                | 19 (19)                           | 53 (41-69)       | 5                                   | Reduced disc height and reduced signal intensity | Present                       | 79% (54%-94%)                  |
| Jarvik et al, 2001 <sup>16</sup>   | Patients with no LBP in the past 4 months that was more than mildly bothersome                       | 148 (131)                         | 54 (36 -71)      | 5                                   | Reduced disc height<br>Reduced signal intensity  | Present<br>Moderate or severe | 56% (48%-64%)<br>83% (77%-89%) |
| Kjaer et al, 2005 <sup>6</sup>     | Volunteers from general population with no LBP in past year                                          | 128 (NA*)                         | 40 (40-40)       | 5                                   | Reduced disc height<br>Reduced signal intensity  | Present<br>Present            | 38% (29%-46%)<br>30% (22%-38%) |
| Luoma et al, 2000 <sup>8</sup>     | Volunteers from three occupations with no LBP in the past year                                       | 37 (37)                           | NA* (40-45)      | 4                                   | Reduced signal intensity                         | Present                       | 76% (59%-88%)                  |
| Paajanen et al, 1989 <sup>37</sup> | Military conscripts with no history of LBP                                                           | 34 (34)                           | 20 (NA*)         | 5                                   | Reduced signal intensity                         | Present                       | 35% (20%-54%)                  |

|                                     |                                                                                                            |           |               |      |                                                  |                                                                                       |                               |
|-------------------------------------|------------------------------------------------------------------------------------------------------------|-----------|---------------|------|--------------------------------------------------|---------------------------------------------------------------------------------------|-------------------------------|
| Paajanen et al, 1997 <sup>38</sup>  | Asymptomatic controls                                                                                      | 136 (NA*) | NA* (20-49)   | NA*  | Reduced signal intensity                         | Present                                                                               | 56% (47%-64%)                 |
| Ranson et al, 2005 <sup>39</sup>    | Fast bowlers with no LBP in past 3 months                                                                  | 36 (36)   | 26 (NA*)      | 5    | Reduced disc height or reduced signal intensity  | Severe                                                                                | 33% (19%-51%)                 |
| Salminen et al, 1999 <sup>23</sup>  | Schoolchildren with no history of LBP                                                                      | 19 (NA*)  | 18 (18-18)    | 5    | Reduced disc height<br>Reduced signal intensity  | Present<br>Present                                                                    | 11% (1%-33%)<br>37% (16%-62%) |
| Savage et al, 1997 <sup>7</sup>     | Volunteers from 5 occupations with no LBP in past year                                                     | 70 (70)   | NA* (≥20-≤58) | 5    | Reduced signal intensity                         | Present                                                                               | 30% (20%-42%)                 |
| Swärd et al, 1991 <sup>5</sup>      | Elite gymnasts and non-athletes with no history of LBP                                                     | 15 (15)   | (≥19-≤29)     | 7-12 | Reduced signal intensity (thoraco-lumbar spine)  | Present                                                                               | 27% (8%-55%)                  |
| Stadnik et al, 1998 <sup>40</sup>   | Volunteers referred for head and neck imaging with no LBP or sciatica in past 6 months                     | 36 (20)   | 42 (17-71)    | 3    | Reduced disc height and reduced signal intensity | Severe                                                                                | 56% (38%-72%)                 |
| Visuri et al, 2005 <sup>24</sup>    | Male conscripts who had never had LBP                                                                      | 90 (90)   | 20 (18-26)    | 5    | Reduced disc height and reduced signal intensity | Present (but ?excluding cases who also had disc protrusion or more severe herniation) | 21% (13%-31%)                 |
| Weishaupt et al, 1998 <sup>18</sup> | Volunteers referred for non-spinal imaging who had never consulted or been absent from work because of LBP | 60 (30)   | 35 (20-50)    | 5    | Reduced signal intensity                         | Moderate or severe                                                                    | 72% (59%-83%)                 |
| Powell et al, 1986 <sup>41</sup>    | Obstetric and gynaecological patients with no spinal symptoms                                              | 273 (0)   | NA* (20-80)   | 5    | Reduced signal intensity                         | Present                                                                               | 52% (46%-58%)                 |
| Carragee et al, 2006 <sup>42</sup>  | Cervical disc disease patients with no history of LBP causing functional loss or requiring treatment       | 200 (119) | 39 (NA*)      | 5    | Grading system of Pearce et al <sup>†</sup>      | Moderate or severe                                                                    | 77% (71%-82%)                 |
| Schenk et al, 2006 <sup>10</sup>    | Nurses with ≤ 7 days LBP in past year                                                                      | 34 (0)    | 51 (NA*)      | 5    | Not stated                                       | Advanced                                                                              | 12% (3%-27%)                  |

1 \*NA = not available      †Described in Eyre D, Mooney V, Caterson B. Intervertebral disk: future directions. In Frymoyer JW, Gordon LS, eds. New  
2 perspectives on low back pain. Park Ridge: American Academy of Orthopaedic Surgeons, 1989: 209-14.

1 **Supplementary Table B: Association of disc degeneration with low back pain**

| Reference                          | Population studied                                                                                                                     | Definition of disc degeneration                  | Low back pain           |                            | No low back pain        |                            | Odds ratio (95% CI) |
|------------------------------------|----------------------------------------------------------------------------------------------------------------------------------------|--------------------------------------------------|-------------------------|----------------------------|-------------------------|----------------------------|---------------------|
|                                    |                                                                                                                                        |                                                  | Disc degeneration n (%) | No disc degeneration n (%) | Disc degeneration n (%) | No disc degeneration n (%) |                     |
| Boos et al, 1995 <sup>20</sup>     | 46 LBP patients with concordant symptoms on discography: 46 volunteers who had never consulted or been absent from work because of LBP | Grading system of Pearce et al <sup>†</sup>      | 44 (96)                 | 2 (4)                      | 39 (85)                 | 7 (15)                     | 4.0 (0.8-20)        |
| Kjaer et al, 2005 <sup>6</sup>     | Volunteers from general population, including 284 with LBP in past year and 128 without such pain                                      | Reduced disc height                              | 171 (60)                | 113 (40)                   | 48 (38)                 | 80 (62)                    | 2.5 (1.6 – 3.9)     |
|                                    |                                                                                                                                        | Reduced signal intensity                         | 148 (52)                | 136 (48)                   | 38 (30)                 | 90 (70)                    | 2.6 (1.7-4.0)       |
| Luoma et al, 2000 <sup>8</sup>     | 143 volunteers from three occupations, including 106 with LBP in past year                                                             | Reduced signal intensity                         | 97 (92)                 | 9 (6)                      | 28 (76)                 | 9 (24)                     | 3.5 (1.3-9.6)       |
| Paajanen et al, 1989 <sup>37</sup> | 75 military conscripts referred to hospital with LBP and 34 volunteers with no history of LBP                                          | Reduced signal intensity                         | 43 (57)                 | 32 (43)                    | 12 (35)                 | 22 (65)                    | 2.5 (1.1-5.7)       |
| Paajanen et al, 1997 <sup>38</sup> | 127 patients with LBP aged 20-49 years and 136 asymptomatic controls                                                                   | Reduced signal intensity                         | 90 (71)                 | 37 (28)                    | 76 (56)                 | 60 (44)                    | 1.9 (1.1-3.2)       |
| Savage et al, 1997 <sup>7</sup>    | 149 volunteers from 5 occupations, including 79 with LBP in past year and 70 without such pain                                         | Reduced signal intensity                         | 37 (47)                 | 42 (53)                    | 21 (30)                 | 49 (70)                    | 2.1 (1.0-4.0)       |
| Swärd et al, 1991 <sup>5</sup>     | Male elite gymnasts and non athletes including 25 with current or past LBP                                                             | Reduced signal intensity (thoraco-lumbar spine)  | 19 (76)                 | 6 (24)                     | 4 (27)                  | 11 (73)                    | 8.7 (2.0-38)        |
| Visuri et al, 2005 <sup>24</sup>   | 108 male conscripts with chronic LBP: 90 male conscripts who had never had LBP                                                         | Reduced disc height and reduced signal intensity | 46 (43)                 | 62 (57)                    | 19 (21)                 | 71 (79)                    | 2.8 (1.5-5.2)       |

2 †Described in Eyre D, Mooney V, Caterson B. Intervertebral disk: future directions. In Frymoyer JW, Gordon LS, eds. New perspectives on low back pain.  
3 Park Ridge: American Academy of Orthopaedic Surgeons, 1989: 209-14.

4
